# Supplementary material for: Prevalence of Hepatitis B in Canadian First-Time Blood Donors: Association with Social Determinants of Health
Source: MDPI journal article supplement (doi:10.3390/v16010117), 2024-01-13
Supplement: s1 [file s1]

**Table S1.** Output from simple logistic regression model with chronic hepatitis B as the dependent variable and race/ethnicity as the independent variable.

| Variable               | Relative Risk | 95% CI       | P Value |
|------------------------|---------------|--------------|---------|
| Aboriginal             | –             |              |         |
| Arab                   | 12.72         | 3.92, 41.30  | <0.0001 |
| Asian (East and other) | 35.52         | 17.41, 72.46 | <0.0001 |
| Black                  | 11.91         | 2.57, 55.08  | 0.0015  |
| Latin American         | -             |              |         |
| South Asian            | 15.42         | 7.02, 33.86  | <0.0001 |
| Other                  | 4.74          | 1.46, 15.38  | 0.0096  |

Note: White is the comparator

**Table S2.** Output from simple logistic regression model with resolved hepatitis B as the dependent variable and race/ethnicity as the independent variable.

| Variable               | Relative Risk | 95% CI       | P Value |
|------------------------|---------------|--------------|---------|
| Aboriginal             | 1.15          | 0.68, 1.96   | 0.5947  |
| Arab                   | 6.51          | 5.34, 7.93   | <0.0001 |
| Asian (East and other) | 18.95         | 17.19, 20.88 | <0.0001 |
| Black                  | 13.66         | 11.31, 16.50 | <0.0001 |
| Latin American         | 1.28          | 0.86, 1.90   | 0.2297  |
| South Asian            | 6.70          | 6.17, 7.93   | <0.0001 |
| Other                  | 1.43          | 2.99, 4.19   | <0.0001 |

Note: White is the comparator
